# Supplementary material for: The formation of colloidal copper nanoparticles stabilized by zinc stearate: one-pot single-step synthesis and characterization of the core–shell particles
Source: Royal Society of Chemistry journal article supplement (doi:10.1039/b908034a), 2009-01-01
Supplement: b908034a.pdf [file b908034a.pdf]

## The Formation of Colloidal Copper Nanoparticles Stabilized by Zinc Stearate: One-Pot Single-Step Synthesis and Characterization of the Core-Shell Particles

André Rittermeier,<sup>a</sup> Marie K. Schröter,<sup>a</sup> Shaojun Miao,<sup>a</sup> Xiaoning Zhang,<sup>b</sup> Maurits W. E. van den Berg,<sup>a</sup> Shankhamala Kundu,<sup>a</sup> Yuemin Wang,<sup>a</sup> Sabine Schimpf,<sup>a</sup> Elke Löffler,<sup>a</sup> Roland A. Fischer<sup>b</sup> and Martin Muhler<sup>\*a</sup>

Electronic Supplementary Data:

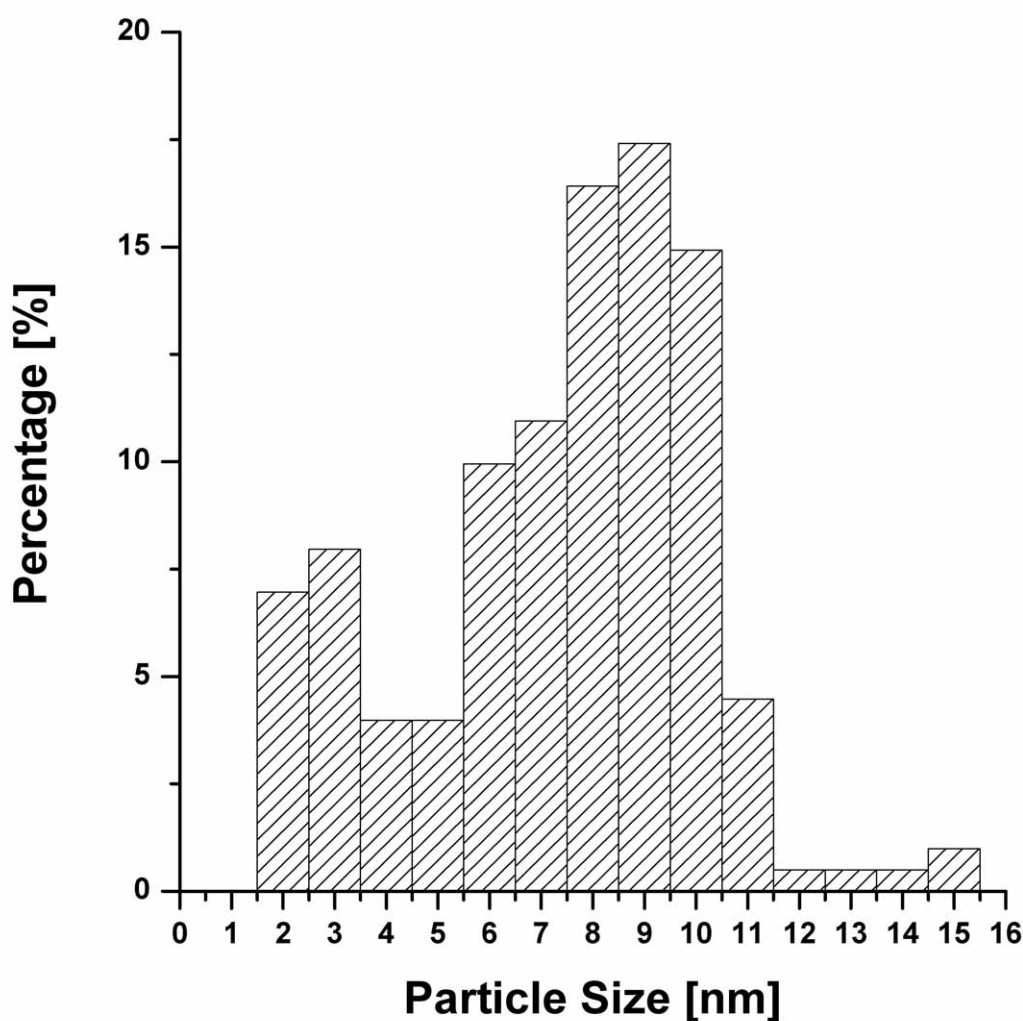

Fig. S1 Particle size distribution of the Cu-Zn-stearate (50:50) colloid.

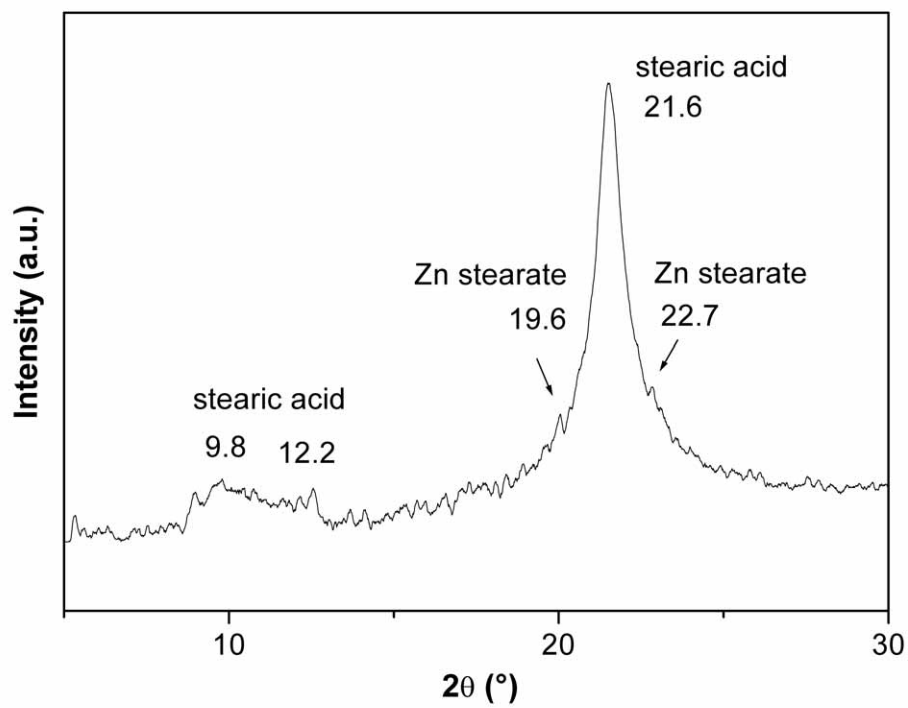

Fig. S2 XRD pattern of the Cu-Zn stearate (50:50) particles in the  $2\theta$  range below  $30^\circ$ .

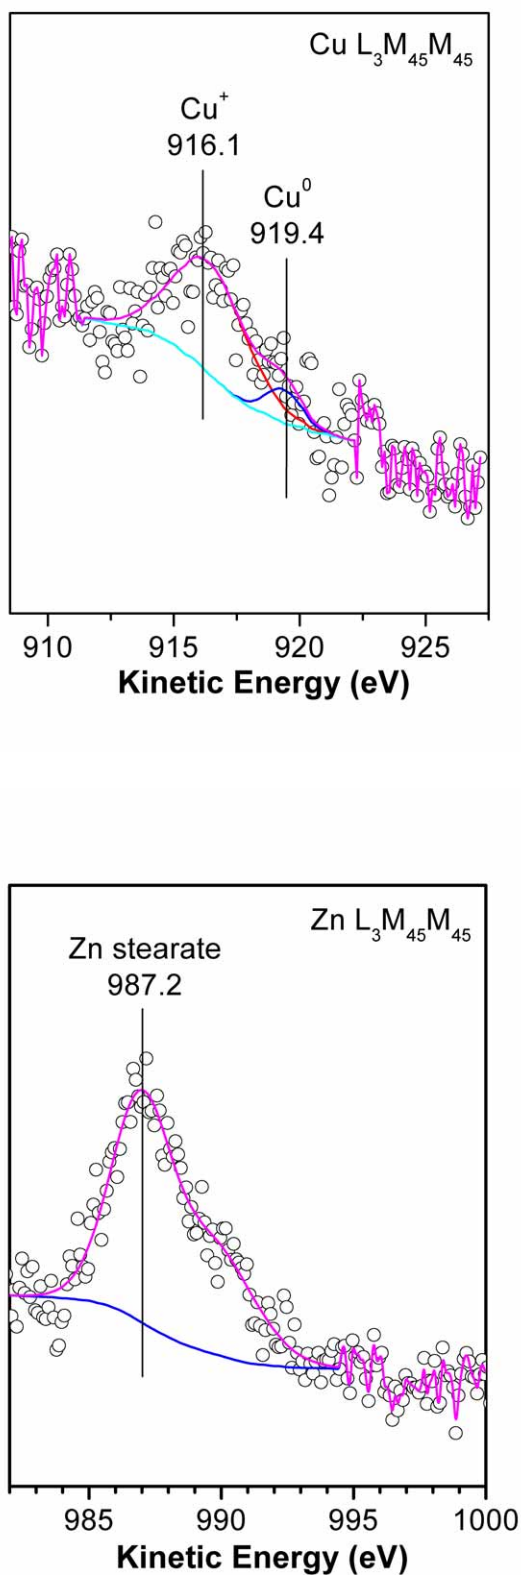

Fig. 3 Auger spectra of the Cu-Zn stearate (50:50) colloid, (a) Cu L<sub>3</sub>M<sub>45</sub>M<sub>45</sub>, (b) Zn L<sub>3</sub>M<sub>45</sub>M<sub>45</sub>.

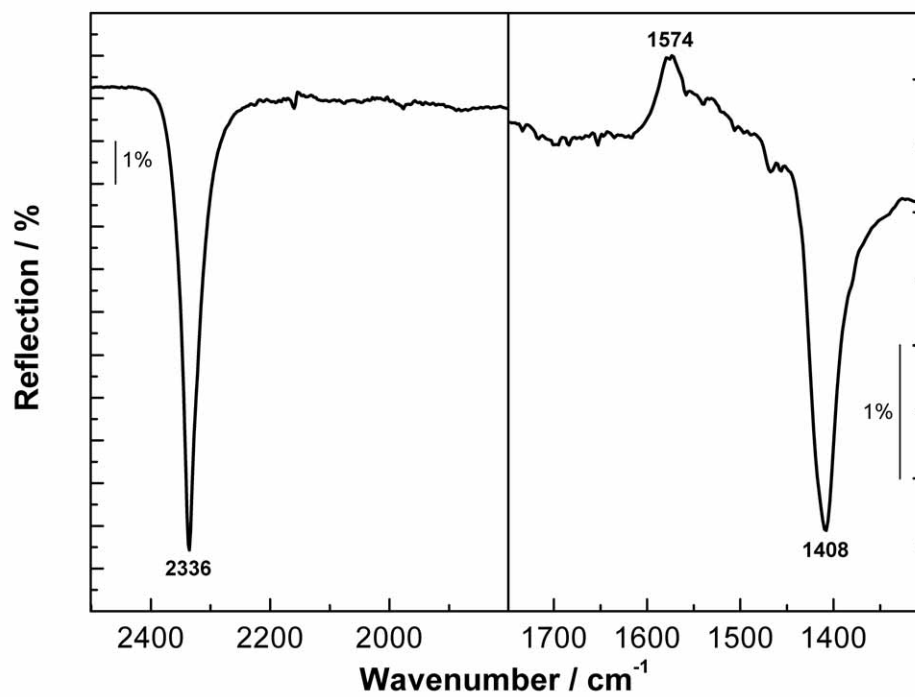

Fig. S4 ATR-FTIR spectrum of the Cu-Zn stearate (50:50) colloid in 100% CO<sub>2</sub> at 1.0 MPa and 473 K.

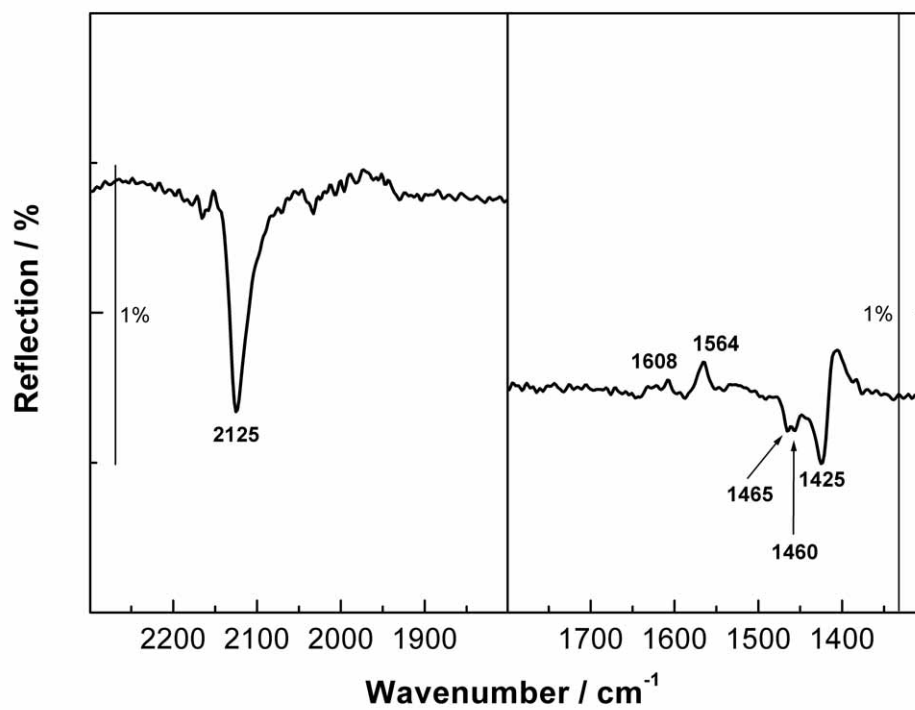

Fig. S5 ATR-FTIR spectrum of the Cu-Al stearate (50:50) colloid in 100% CO at 1.0 MPa and 473 K.
